# Supplementary figures and images for: CDase is a pan-ceramidase in Drosophila
Source: PubMed Central journal article supplement — Mol Biol Cell. 2011 Jan 1;22(1):33–43. doi: 10.1091/mbc.E10-05-0453 (PMC3016975; doi:10.1091/mbc.e10-05-0453), 2011-01-01

**A**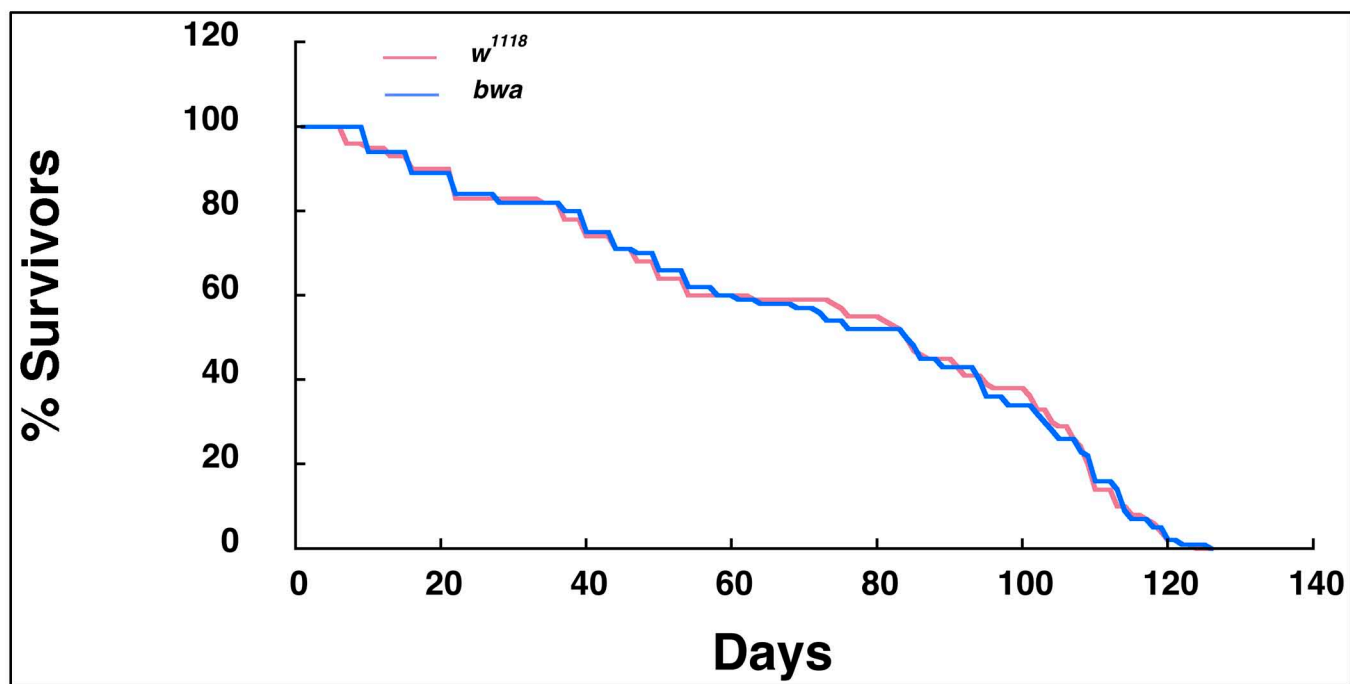**B**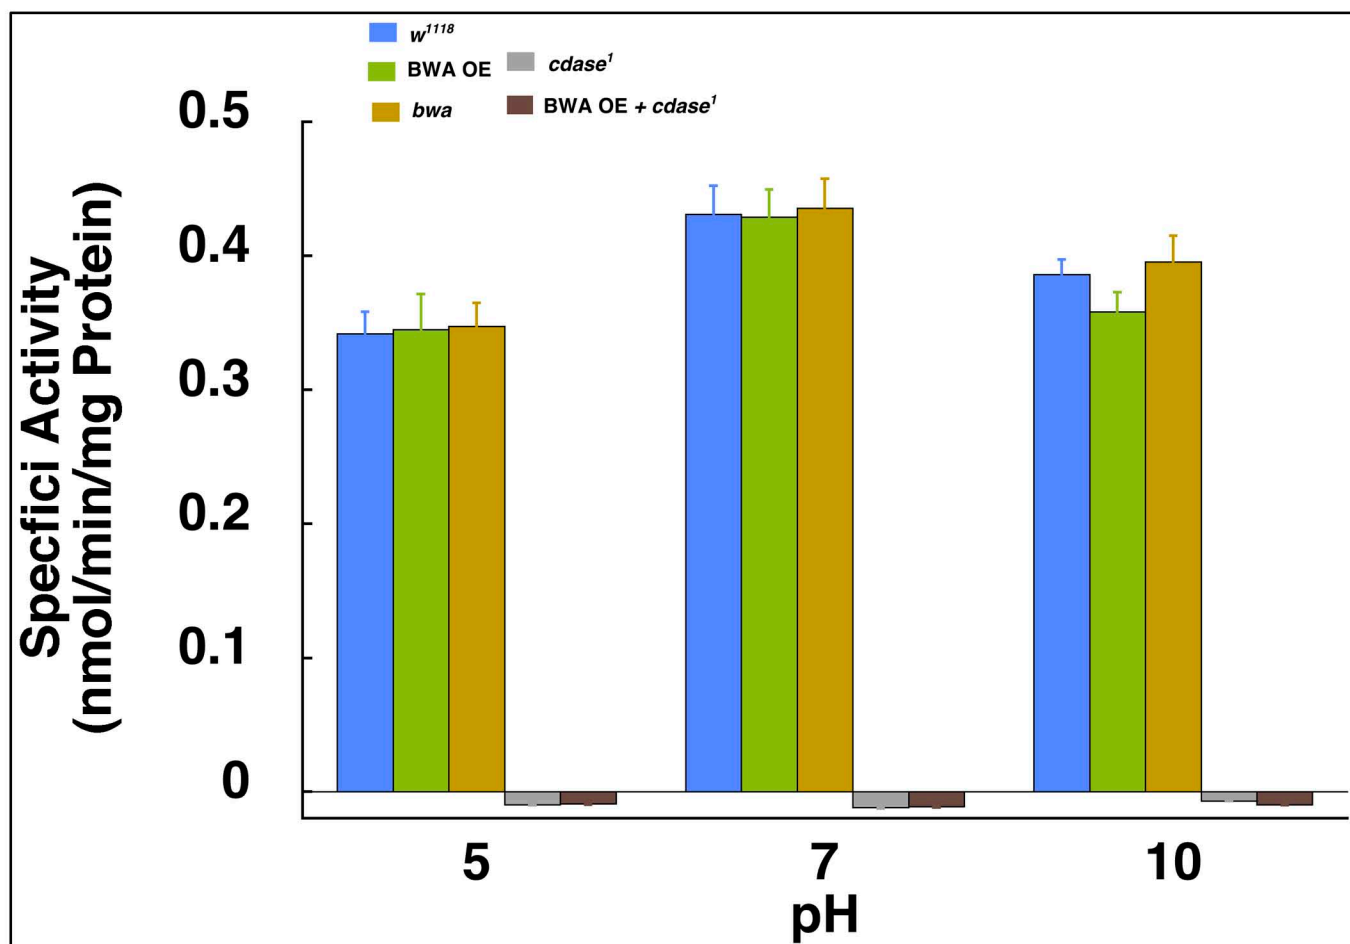

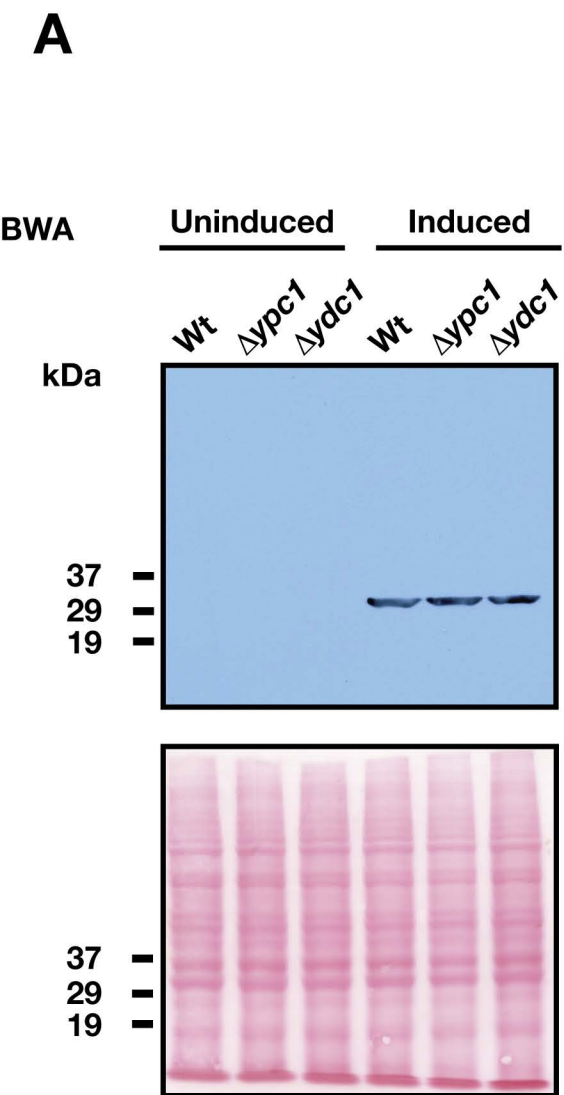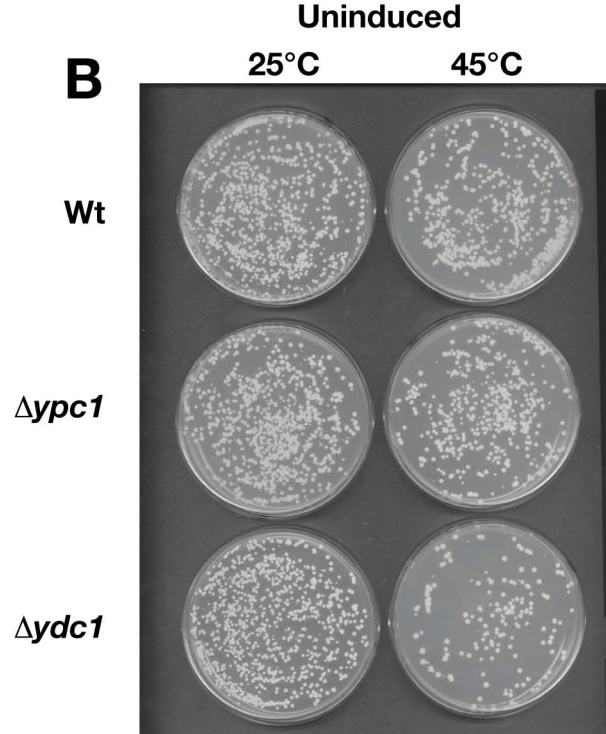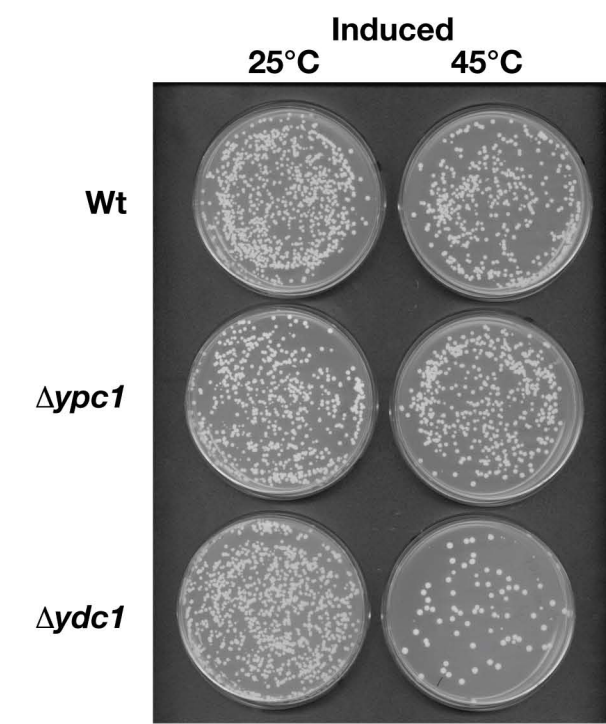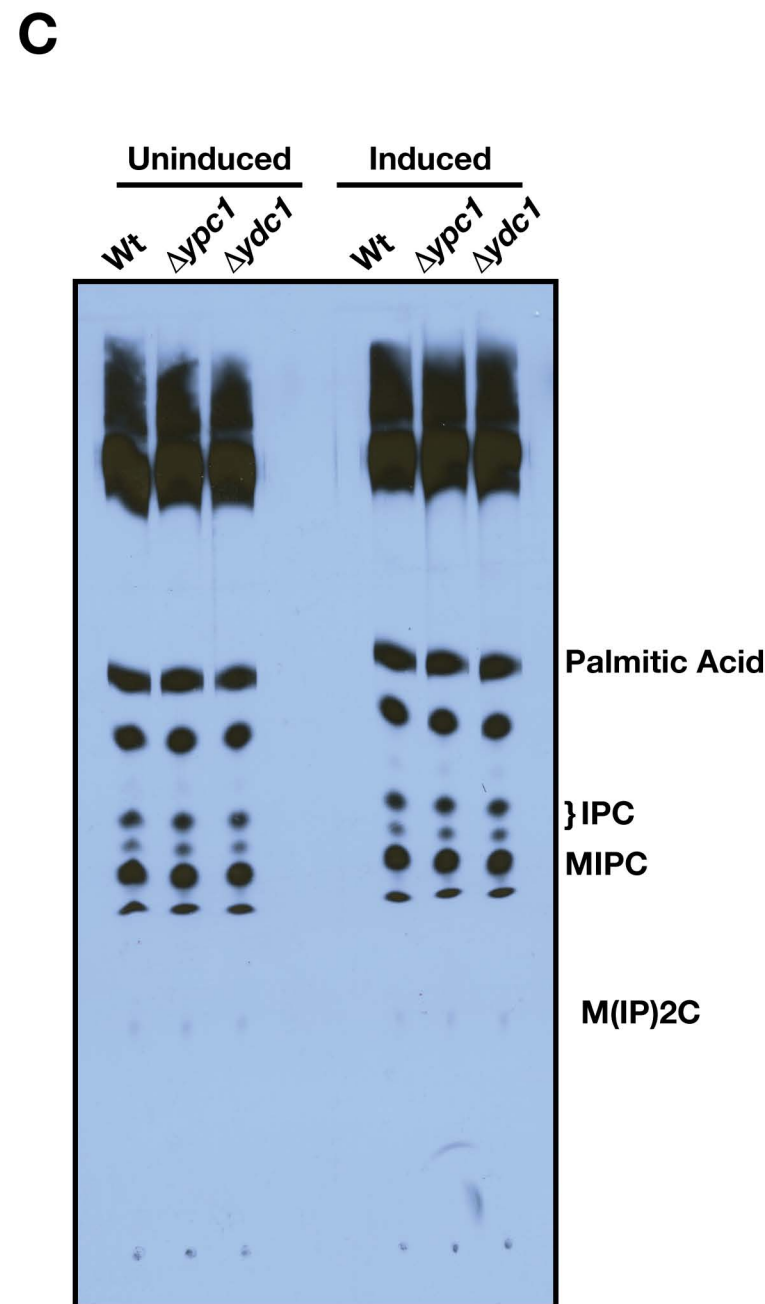

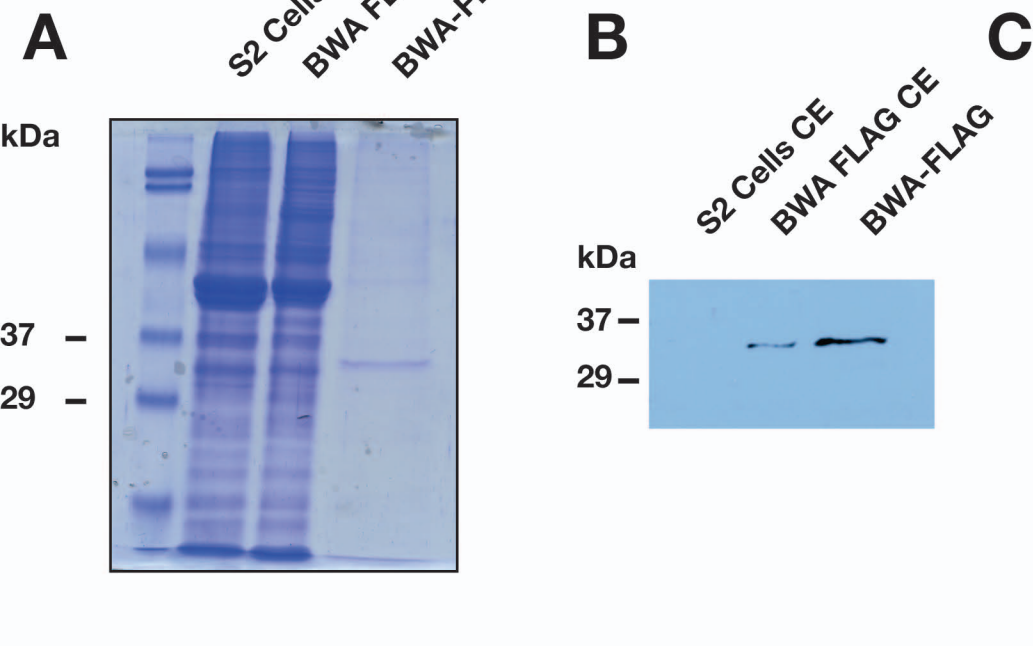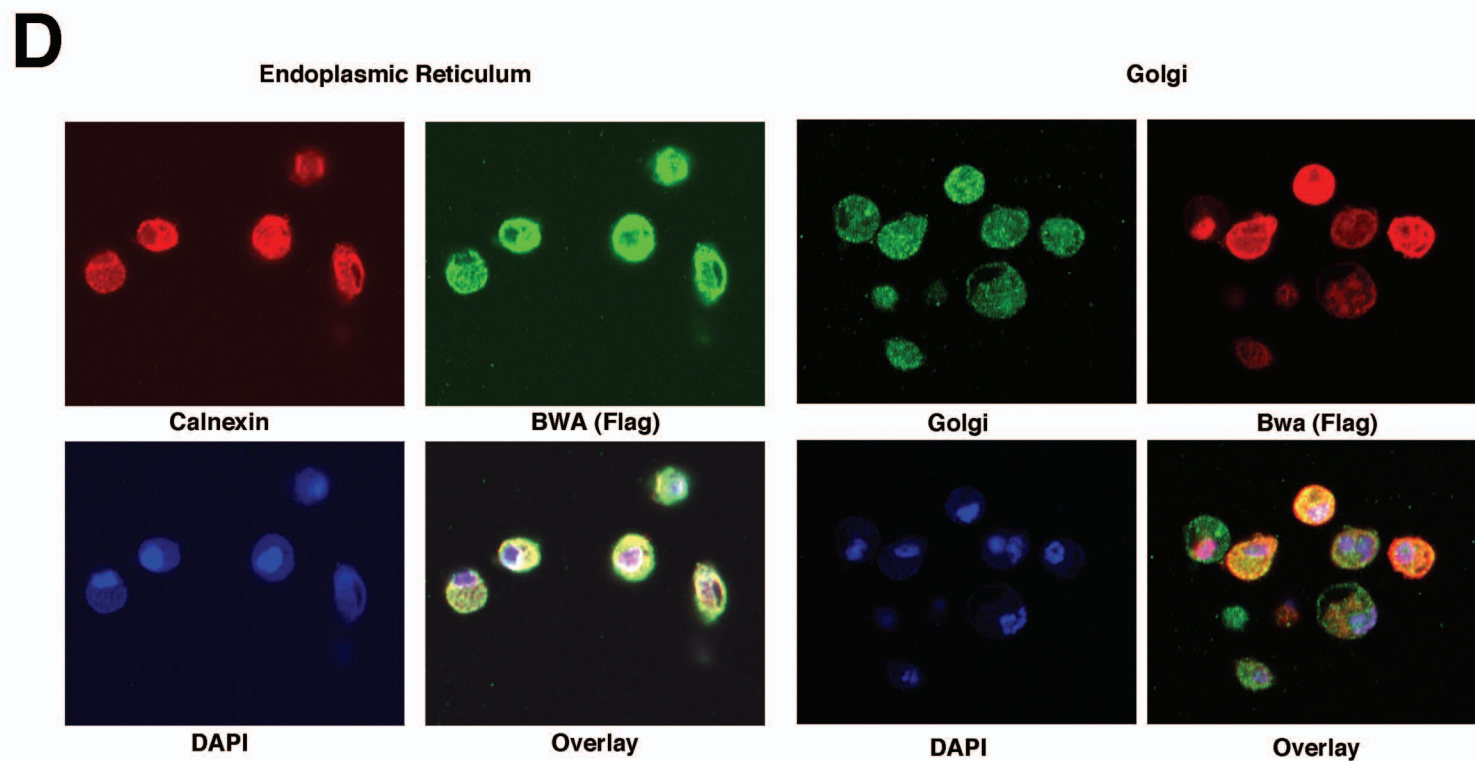

Supplement: E10-05-0453_1.pdf [file E10-05-0453_1.pdf]
